# Supplementary material for: Association of tumor growth rates with molecular biomarker status: a longitudinal study of high-grade glioma
Source: publisher site journal article supplement (doi:10.18632/aging.103110), 2020-05-09
Supplement: Supplementary file [file aging-v12i9-103110-supplementary-material-SD2.pdf]

## SUPPLEMENTARY TABLES

**Supplementary Table 1. Univariable and multivariable linear mixed-effect model for the association of clinical biomarkers with mean tumor diameter (MTD).**

| Fixed effects <sup>a</sup>          | Univariable analysis |       |          |                                | Multivariable analysis |      |          |                   |
|-------------------------------------|----------------------|-------|----------|--------------------------------|------------------------|------|----------|-------------------|
|                                     | $\beta_m$            | SE    | <i>p</i> | <i>p</i> of ANOVA <sup>b</sup> | $\beta_m$              | SE   | <i>p</i> | <i>p</i> of ANOVA |
| Initial MTD                         | 1.0                  | 0.01  | < 0.01** | —                              | 1.0                    | 0.01 | < 0.01** | —                 |
| WHO grades                          |                      |       |          |                                | —                      | —    | —        | —                 |
| Grade IV vs III                     | -0.74                | 2.69  | 0.84     | —                              | —                      | —    | —        | —                 |
| Interval time                       | -0.004               | 0.003 | 0.20     | —                              | —                      | —    | —        | —                 |
| Number of MRI examinations          | -0.78                | 1.16  | 0.53     | —                              | —                      | —    | —        | —                 |
| Age                                 | -0.14                | 0.1   | 0.13     | —                              | —                      | —    | —        | —                 |
| Gender                              |                      |       |          |                                | —                      | —    | —        | —                 |
| Male vs female                      | 6.09                 | 2.69  | 0.02**   | —                              | -0.19                  | 0.22 | 0.37     | —                 |
| Cortisol history                    | -10.83               | 5.38  | 0.05*    | —                              | 0.19                   | 0.36 | 0.61     | —                 |
| Contrast-enhanced type              |                      |       |          | 0.03**                         | —                      | —    | —        | 0.81              |
| Complete vs incomplete              | -8.6                 | 3.15  | 0.01**   | —                              | -0.13                  | 0.4  | 0.74     | —                 |
| Unknown vs non-unknown <sup>c</sup> | 3.1                  | 2.69  | 0.25     | —                              | —                      | —    | —        | —                 |
| Tumor-edema interface               |                      |       |          |                                |                        |      |          |                   |
| Clear vs blur                       | -5.16                | 2.65  | 0.05*    | —                              | 0.18                   | 0.26 | 0.49     | —                 |
| Brain side                          |                      |       |          | 0.79                           |                        |      |          |                   |
| Right Side vs Left Side             | 1.85                 | 2.81  | 0.51     | —                              | —                      | —    | —        | —                 |
| Bilateral vs Left Side              | 0.02                 | 5.34  | 0.99     | —                              | —                      | —    | —        | —                 |
| Number of lobes involved            | 7.95                 | 1.24  | < 0.01** | —                              | -0.05                  | 0.17 | 0.78     | —                 |
| Frontal lobe involved               | 2.74                 | 2.72  | 0.32     | —                              | —                      | —    | —        | —                 |
| Parietal lobe involved              | 9.44                 | 2.79  | < 0.01** | —                              | 0.03                   | 0.28 | 0.93     | —                 |
| Occipital lobe involved             | 11.62                | 3.86  | < 0.01** | —                              | 0.14                   | 0.34 | 0.68     | —                 |
| Temporal lobe involved              | 9.17                 | 2.55  | < 0.01** | —                              | 0.01                   | 0.25 | 0.96     | —                 |
| Insular lobe involved               | 0.47                 | 3.62  | 0.9      | —                              | —                      | —    | —        | —                 |
| Stem involved                       | 0.18                 | 5.16  | 0.97     | —                              | —                      | —    | —        | —                 |
| Thalamus involved                   | 4.03                 | 5.47  | 0.46     | —                              | —                      | —    | —        | —                 |
| Cerebellum involved                 | -4.20                | 7.14  | 0.56     | —                              | —                      | —    | —        | —                 |
| Ventricle involved                  | -4.01                | 6.42  | 0.53     | —                              | —                      | —    | —        | —                 |

Abbreviation: WHO, World Health Organization; SE, standard error; ANOVA, analysis of variance; LME, linear mixed-effect model.

a. LME in prediction of MTD:

$$MTD_{ij} = \beta_0 + \beta_1 \times T_{ij} + \beta_m \times I_m + \alpha_{1i} + \alpha_{2i} \times T_{ij} + \varepsilon_{ij}$$

b. Biomarkers with more than 2 classification types were used ANOVA to estimate their fixed effects on MTD.

c. For biomarkers with unknown or NOS group, we first evaluate the NOS group with the non-NOS group to figure out if the subgroups were distributed inconsistency between those two groups. Only biomarkers with consistent distribution were taken into multivariable analysis.

\* *p*-value < 0.1 showed marginally statistically significance.

\*\* *p*-value < 0.05 showed statistically significance.

**Supplementary Table 2. Univariable and multivariable linear mixed-effect model for the association of clinical biomarkers with tumor growth.**

| Interaction term <sup>a</sup>       | Univariable analysis |       |          |                                | Multivariable analysis |       |          |                   |
|-------------------------------------|----------------------|-------|----------|--------------------------------|------------------------|-------|----------|-------------------|
|                                     | $\beta_n$            | SE    | <i>p</i> | <i>p</i> of ANOVA <sup>b</sup> | $\beta_n$              | SE    | <i>p</i> | <i>p</i> of ANOVA |
| Initial MTD                         | 0.19                 | 0.35  | 0.60     | —                              | —                      | —     | —        | —                 |
| WHO grades                          |                      |       |          |                                |                        |       |          |                   |
| Grade IV vs III                     | 34.37                | 9.24  | < 0.01** | —                              | 27.48                  | 9.77  | 0.01**   | —                 |
| Interval time                       | -0.03                | 0.01  | 0.01**   | —                              | -0.02                  | 0.01  | 0.19     | —                 |
| Number of MRI examinations          | -8.35                | 3.01  | 0.01**   | —                              | -6.08                  | 4.31  | 0.16     | —                 |
| Age                                 | 0.63                 | 0.35  | 0.08*    | —                              | 0.17                   | 0.38  | 0.65     | —                 |
| Gender                              |                      |       |          |                                |                        |       |          |                   |
| Male vs female                      | 2.56                 | 10.09 | 0.80     | —                              | —                      | —     | —        | —                 |
| Cortisol history                    | 15.13                | 19.92 | 0.45     | —                              | —                      | —     | —        | —                 |
| Contrast-enhanced type              |                      |       |          | 0.13                           |                        |       |          | —                 |
| Complete vs incomplete              | -4.07                | 1.84  | 0.03     | —                              | —                      | —     | —        | —                 |
| Unknown vs non-unknown <sup>c</sup> | 16.28                | 9.40  | 0.08     | —                              | —                      | —     | —        | —                 |
| Tumor-edema interface               |                      |       |          |                                |                        |       |          | —                 |
| Clear vs blur                       | 20.12                | 8.45  | 0.02**   | —                              | -2.24                  | 10.68 | 0.83     | —                 |
| Brain side                          |                      |       |          | 0.11                           |                        |       |          | —                 |
| Right Side vs Left Side             | 15.28                | 9.12  | 0.10     | —                              | —                      | —     | —        | —                 |
| Bilateral vs Left Side              | -15.05               | 17.40 | 0.39     | —                              | —                      | —     | —        | —                 |
| Number of lobes involved            | 4.62                 | 4.72  | 0.33     | —                              | —                      | —     | —        | —                 |
| Frontal lobe involved               | -10.24               | 8.81  | 0.25     | —                              | —                      | —     | —        | —                 |
| Parietal lobe involved              | 19.46                | 9.48  | 0.04**   | —                              | -24.91                 | 18.22 | 0.17     | —                 |
| Occipital lobe involved             | 29.36                | 14.55 | 0.04**   | —                              | 8.50                   | 10.57 | 0.42     | —                 |
| Temporal lobe involved              | 7.36                 | 8.84  | 0.41     | —                              | —                      | —     | —        | —                 |
| Insular lobe involved               | 0.71                 | 11.29 | 0.95     | —                              | —                      | —     | —        | —                 |
| Stem involved                       | -36.19               | 18.48 | 0.05*    | —                              | 8.92                   | 14.97 | 0.55     | —                 |
| Thalamus involved                   | 2.94                 | 20.67 | 0.89     | —                              | —                      | —     | —        | —                 |
| Cerebellum involved                 | -5.02                | 22.75 | 0.83     | —                              | —                      | —     | —        | —                 |
| Ventricle involved                  | 5.13                 | 22.69 | 0.82     | —                              | —                      | —     | —        | —                 |

Abbreviation: WHO, World Health Organization; SE, standard error; ANOVA, analysis of variance; LME, linear mixed-effect model.

a. Evaluation of clinical acceleration effects in LME:

$$MTD_{ij} = \beta_0 + \beta_1 \times T_{ij} + \beta_2 \times iMTD + \beta_n \times (I_n \times T_{ij}) + \beta_{n+1} \times I_n + \alpha_{1i} + \alpha_{2i} \times T_{ij} + \varepsilon_{ij}$$

b. Biomarkers with more than 2 classification types were used ANOVA to estimate their fixed effects on MTD.

c. For biomarkers with unknown or NOS group, we first evaluate the NOS group with the non-NOS group to figure out if the subgroups were distributed inconsistency between those two groups. Only biomarkers with consistent distribution were taken into multivariable analysis.

\* *p*-value < 0.1 showed marginally statistically significance.

\*\* *p*-value < 0.05 showed statistically significance.

**Supplementary Table 4. Univariable and multivariable linear mixed-effect model for the association of combination molecular groups with tumor growth.**

| Molecular groups                        | No.      | Univariable analysis     |      |          | Multivariable analysis   |       |          |
|-----------------------------------------|----------|--------------------------|------|----------|--------------------------|-------|----------|
|                                         |          | Interaction coefficients | SE   | <i>p</i> | Interaction coefficients | SE    | <i>p</i> |
| <i>IDHI + TERT + 1p/19q<sup>a</sup></i> |          |                          |      |          |                          |       |          |
| Triple-positive                         | 6        | reference                |      |          | reference                |       |          |
| <i>TERT</i> mt and <i>IDHI</i> mt       | 3        | 0.8                      | 30.6 | 0.98     | 0.3                      | 31.2  | 0.99     |
| <i>IDHI</i> mt only                     | 5        | 32.0                     | 27.7 | 0.3      | 27.0                     | 30.6  | 0.4      |
| <i>TERT</i> mt only                     | 12       | 73.0                     | 23.2 | 0.002**  | 64.4                     | 26.4  | 0.02**   |
| Triple-negative                         | 12       | 18.5                     | 22.8 | 0.4      | 17.7                     | 25.4  | 0.5      |
| Other biomarkers                        |          |                          |      |          |                          |       |          |
| WHOG (Grade IV vs III)                  | 56 vs 55 | 27.5                     | 9.8  | 0.005**  | 19.46                    | 10.23 | 0.06     |
| ATRX (high vs low)                      | 14 vs 21 | 31.6                     | 16.2 | 0.05*    | 23.22                    | 17.02 | 0.17     |
| Ki67 (high vs low)                      | 55 vs 36 | 20.1                     | 11.3 | 0.08*    | 16.64                    | 11.18 | 0.90     |
| <i>MGMT</i> (met vs non-met)            | 27 vs 10 | -37.4                    | 17.6 | 0.03**   | -11.14                   | 19.29 | 0.56     |
| Other biomarkers                        |          |                          |      |          |                          |       |          |
| <i>IDHI + MGMT<sup>b</sup></i>          |          |                          |      |          |                          |       |          |
| <i>IDHI</i> mt and <i>MGMT</i> met      | 14       | reference                |      |          | reference                |       |          |
| <i>IDHI</i> mt/ <i>MGMT</i> met only    | 14       | 29.4                     | 18.0 | 0.1      | 34.3                     | 19.7  | 0.08*    |
| <i>IDHI</i> wt and non- <i>MGMT</i> met | 9        | 61.0                     | 20.9 | 0.004**  | 57.8                     | 21.2  | 0.01**   |
| Other biomarkers                        |          |                          |      |          |                          |       |          |
| WHOG (Grade IV vs III)                  | 56 vs 55 | 27.5                     | 9.8  | 0.005**  | 16.57                    | 10.48 | 0.12     |
| ATRX (high vs low)                      | 14 vs 21 | 31.6                     | 16.2 | 0.05*    | 26.03                    | 16.72 | 0.12     |
| Ki67 (high vs low)                      | 55 vs 36 | 20.1                     | 11.3 | 0.08*    | 16.94                    | 11.24 | 0.13     |
| <i>TERT</i> (mt vs wt)                  | 22 vs 19 | 52.4                     | 25.7 | 0.04**   | 18.26                    | 15.90 | 0.25     |
| <i>IDHI + ATRX<sup>c</sup></i>          |          |                          |      |          |                          |       |          |
| <i>IDHI</i> mt + ATRX low               | 7        | reference                |      |          | reference                |       |          |
| <i>IDHI</i> mt + ATRX high              | 5        | -10.4                    | 25.9 | 0.7      | -14.4                    | 26.8  | 0.6      |
| <i>IDHI</i> wt + ATRX low               | 14       | 3.3                      | 21.5 | 0.9      | -3.1                     | 22.8  | 0.9      |
| <i>IDHI</i> wt + ATRX high              | 9        | 61.9                     | 23.7 | 0.01*    | 48.8                     | 25.9  | 0.06*    |
| Other biomarkers                        |          |                          |      |          |                          |       |          |
| WHOG (Grade IV vs III)                  | 56 vs 55 | 27.5                     | 9.8  | 0.005**  | 19.05                    | 10.13 | 0.06*    |
| <i>MGMT</i> (met vs non-met)            | 27 vs 10 | -37.4                    | 17.6 | 0.03**   | -27.14                   | 17.64 | 0.13     |
| Ki67 (high vs low)                      | 55 vs 36 | 20.1                     | 11.3 | 0.08*    | 17.96                    | 11.27 | 0.11     |
| <i>TERT</i> (mt vs wt)                  | 22 vs 19 | 52.4                     | 25.7 | 0.04**   | 11.14                    | 15.14 | 0.46     |

Abbreviations: wt, wild type; mt, mutation type; met, methylation; SE, standard error.

\* *p*-value < 0.1 showed marginally statistically significance.

\*\* *p*-value < 0.05 showed statistically significance.

**Supplementary Table 5. Comparison between linear mixed-effects models.**

|                  | DF                                                                                                                              | AIC    | BIC    | LogLik  | MSE   | R    | LRStat | p       |
|------------------|---------------------------------------------------------------------------------------------------------------------------------|--------|--------|---------|-------|------|--------|---------|
| Previous Model a | 4                                                                                                                               | 1955.8 | 1970   | -973.9  | 38.31 | 0.85 | 718.03 | < 0.01* |
| Present Model    | 7                                                                                                                               | 1243.8 | 1268.6 | -614.88 | 1.16  | 0.99 |        |         |
| Formula          |                                                                                                                                 |        |        |         |       |      |        |         |
| Previous Model   | $MTD_{ij} = \beta_0 + \beta_1 \times T_{ij} + \beta_2 \times iMTD + \alpha_{1i} + \alpha_{2i} \times T_{ij} + \varepsilon_{ij}$ |        |        |         |       |      |        |         |
| Present Model    | $MTD_{ij} = \beta_0 + \beta_1 \times T_{ij} + \alpha_i + \varepsilon_{ij}$                                                      |        |        |         |       |      |        |         |

DF, degrees of freedom; AIC, Akaike information criterion; BIC, Bayesian information criterion; LogLik, maximized loglikelihood; LRStat, likelihood ratio test statistic.

a. Mandonnet E, Delattre JY, Tanguy ML, et al. Continuous growth of mean tumor diameter in a subset of grade II gliomas. *Annals of neurology* 2003;53:524-528.

**Supplementary Table 6. Antibodies of immunohistochemical.**

| Antibody   | Host species | Batch number | Clone       | Dilution | Suppliers | Antigen retrieval |
|------------|--------------|--------------|-------------|----------|-----------|-------------------|
| ATRX       | rabbit       | ZA-0016      | pAbs        | 1:100    | ZSGB-BIO  | EDTA pH 8.0       |
| GFAP       | mouse        | ZM-0118      | UMAB129 mAb | 1:100    | ZSGB-BIO  | EDTA pH 8.0       |
| Olig-2     | mouse        | ZA-0561      | EP112 mAb   | 1:100    | ZSGB-BIO  | EDTA pH 8.0       |
| TOPO2      | mouse        | ZM-0245      | OTI2D12 mAb | 1:100    | ZSGB-BIO  | EDTA pH 8.0       |
| P-170      | mouse        | ZM-0189      | C494 mAb    | 1:100    | ZSGB-BIO  | EDTA pH 8.0       |
| MMP-9      | rabbit       | ZA-0562      | EP127 mAb   | 1:100    | ZSGB-BIO  | EDTA pH 8.0       |
| GST- $\pi$ | mouse        | ZM-0110      | OTI4B6 mAb  | 1:100    | ZSGB-BIO  | EDTA pH 8.0       |
| Ki67       | mouse        | ZM-0167      | MIB1 mAb    | 1:100    | ZSGB-BIO  | EDTA pH 8.0       |
| MGMT       | mouse        | ZM-0461      | UMAB56 mAb  | 1:100    | ZSGB-BIO  | EDTA pH 8.0       |
| EGFR       | rabbit       | ZA-0505      | EP22 mAb    | 1:100    | ZSGB-BIO  | EDTA pH 8.0       |
| VEGF       | rabbit       | ZA-0509      | PAbs        | 1:100    | ZSGB-BIO  | EDTA pH 8.0       |
| PTEN       | rabbit       | ZA-0635      | D4.3 mAb    | 1:100    | ZSGB-BIO  | EDTA pH 8.0       |
| p53        | mouse        | ZM-0408      | DO-7 mAb    | 1:100    | ZSGB-BIO  | EDTA pH 8.0       |

Abbreviations: pAbs, polyclonal antibody; mAb, monoclonal antibody; ZSGB-BIO, Zhongshan Gold Bridge Biotechnology; EDTA, Ethylene-diamine-tetraacetic acid.
